# Supplementary material
Source: PubMed Central journal article supplement (PMC8110527)
Supplement: 41431_2020_796_MOESM6_ESM.pdf [file 41431_2020_796_MOESM6_ESM.pdf]

**Table S3: Clinically Reportable Variants Identified in the Diagnostic Cohort**

| Pt. ID | Age at test (yrs) | Typical or Atypical PKD | Enlarged Kidneys | CKD Stage | FHx of PKD | Gene         | Exon^        | Coding Change <sup>s</sup>            | Protein Change <sup>&amp;</sup>     | Variant Classification <sup>#</sup> | Novel   |
|--------|-------------------|-------------------------|------------------|-----------|------------|--------------|--------------|---------------------------------------|-------------------------------------|-------------------------------------|---------|
| D038   | 30                | T                       | Y                | 1         | Y          | <i>PKD1</i>  | 23           | NM_001009944.2:c.8458_8459del         | p.(Ser2820*)                        | P                                   | Y       |
| D041   | 42                | T                       | Y                | NR        | N          | <i>PKD1</i>  | IVS26        | NM_001009944.2:c.9398-1G>C            | p.?                                 | P                                   | Y       |
| D128   | 34                | A                       | N                | 1         | Y          | <i>PKD2</i>  | IVS2         | NM_000297.3:c.709+1G>T                | p.?                                 | P                                   | Y       |
| D158   | 24                | T                       | N                | 1         | Y          | <i>PKD1</i>  | IVS18        | NM_001009944.2:c.7489+5G>A            | p.?                                 | VUS                                 | N       |
| D163   | 31                | T                       | N                | 1         | N          | <i>PKD1</i>  | 23           | NM_001009944.2:c.8447T>C              | p.(Leu2816Pro)                      | VUS                                 | N       |
| D164   | 71                | A                       | N                | 4         | Y          | <i>GANAB</i> | 11           | NM_198335.3:c.1208G>C                 | p.(Ser403Thr)                       | VUS                                 | Y       |
| D165   | 44                | A                       | N                | 3         | N          | <i>HNF1B</i> |              | Whole gene deletion                   |                                     | P                                   | N       |
| D166   | 39                | A                       | N                | 1         | N          | <i>PKD1</i>  | 15           | NM_001009944.2:c.4592A>G              | p.(Asn1531Ser)                      | VUS                                 | Y       |
| D329   | 58                | T                       | Y                | 1         | Y          | <i>PKD2</i>  | 9            | NM_000297.3:c.1973del                 | p.(Pro658fs)                        | LP                                  | Y       |
| D335   | 0                 | A                       | Y                | 5         | N          | <i>PKD1</i>  | 23/<br>42    | NM_001009944.2:c.[8302G>A];[11579C>T] | p.[(Val2768Met)];<br>[(Ala3860Val)] | VUS<br>/VUS                         | N/<br>Y |
| D3936  | 28                | A                       | N                | 3         | Y          | <i>PKHD1</i> | 3/<br>30     | NM_138694.3:c.107C>T(;);3467C>T       | p. (Thr36Met)<br>(;)(Ser1156Leu)    | P/<br>LP                            | N/<br>N |
| D429   | 34                | A                       | Y                | 1         | N          | <i>PKD1</i>  | 15           | NM_001009944.2:c.4828_4830del         | p.(Ile1610del)                      | VUS                                 | N       |
| D443   | 0                 | A                       | Y                | 5         | N          | <i>PKHD1</i> | IVS17<br>/61 | NM_138694.3:c.[1602+1G>A];[10174C>T]  | p.[?];[(Gln3392*)]                  | P/<br>P                             | N/<br>N |

|       |    |   |    |    |   |             |       |                                           |                                |       |     |
|-------|----|---|----|----|---|-------------|-------|-------------------------------------------|--------------------------------|-------|-----|
| D501  | 42 | T | Y  | 1  | N | <i>PKD2</i> | 5     | NM_000297.3:c.1258A>G                     | p.(Arg420Gly)                  | LP    | N   |
| D5183 | 0  | A | Y  | 5  | Y | <i>PKD1</i> | 16/40 | NM_001009944.2:c.6994_7000dup(;):11399C>G | p.(Val2334fs)(;)(Pro3800Arg)   | P/VUS | N/Y |
| D598  | 64 | T | NR | NR | Y | <i>PKD1</i> | 45    | NM_001009944.2:c.12326_12335del           | p.(Arg4109fs)                  | LP    | Y   |
| D599  | 18 | T | N  | 1  | Y | <i>PKD1</i> | 5     | NM_001009944.2:c.856_862del               | p.(Gly287*)                    | P     | N   |
| D6038 | 34 | T | NR | 1  | Y | <i>PKD1</i> | 40    | NM_001009944.2:c.11338_11344dup           | p.(Asp3782fs)                  | P     | N   |
| D646  | 50 | T | N  | 5  | Y | <i>PKD1</i> | IVS42 | NM_001009944.2:c.11712+1G>C               | p.?                            | LP    | Y   |
| D648  | 25 | A | NR | NR | N | <i>PKD1</i> | IVS33 | NM_001009944.2:c.10405+5G>T               | p.?                            | VUS   | N   |
| D688  | 3  | A | Y  | 4  | N | <i>PKD1</i> | 23    | NM_001009944.2:c.8251C>T                  | p.(Gln2751*)                   | P     | N   |
| D702  | 2  | A | Y  | 1  | N | <i>PKD1</i> | 15/37 | NM_001009944.2:c.[3746del];[10939C>T]     | p.[(Asp1249fs)];[(Arg3647Trp)] | P/VUS | Y/Y |
| D709  | 58 | T | Y  | 3  | Y | <i>PKD1</i> | 14    | NM_001009944.2:c.3202C>T                  | p.(Gln1068*)                   | P     | N   |
| D710  | 57 | T | Y  | 3  | Y | <i>PKD1</i> | 15    | NM_001009944.2:c.5855G>A                  | p.(Gly1952Asp)                 | VUS   | N   |
| D711  | 63 | T | N  | 5  | Y | <i>PKD1</i> | 15    | NM_001009944.2:c.6806C>G                  | p.(Ser2269*)                   | P     | N   |
| D719  | 40 | A | N  | 1  | N | <i>PKD1</i> | 6     | NM_001009944.2:c.1260C>G                  | p.(Tyr420*)                    | LP    | Y   |
| D720  | 35 | A | Y  | 1  | Y | <i>PKD1</i> | 38    | NM_001009944.2:c.11105A>C                 | p.(Gln3702Pro)                 | VUS   | Y   |
| D721  | 50 | T | NR | NR | Y | <i>PKD1</i> | 25    | NM_001009944.2:c.8955_8962del             | p.(Arg2985fs)                  | LP    | Y   |

|      |    |   |    |    |   |              |           |                                         |                                   |             |         |
|------|----|---|----|----|---|--------------|-----------|-----------------------------------------|-----------------------------------|-------------|---------|
| D722 | 37 | T | NR | 2  | Y | <i>PKD1</i>  | IVS43     | NM_001009944.2:c.12004-2A>G             | p.?                               | LP          | N       |
| D730 | 37 | T | NR | NR | Y | <i>PKD1</i>  | 11        | NM_001009944.2:c.2180T>C                | p.(Leu727Pro)                     | LP          | N       |
| D738 | 15 | T | Y  | 1  | Y | <i>PKD1</i>  | 37        | NM_001009944.2:c.10958C>T               | p.(Ala3653Val)                    | LP          | N       |
| D830 | 48 | A | N  | 2  | N | <i>PKD1</i>  | 18        | NM_001009944.2:c.7409C>T                | p.(Pro2470Leu)                    | VUS         | N       |
| D159 | 34 | A | N  | 1  | N | <i>PKD1</i>  | 23/<br>43 | NM_001009944.2:c.8531T>C(;)<br>11972C>T | p.(Val2844Ala)(;)<br>(Ala3991Val) | VUS/<br>VUS | Y/<br>N |
| D837 | 49 | A | N  | 1  | N | <i>PKD1</i>  | 15        | NM_001009944.2:c.3994G>A                | p.(Asp1332Asn)                    | VUS         | N       |
| D869 | 48 | A | Y  | 3  | N | <i>PKD1</i>  | 15        | NM_001009944.2:c.3883G>T                | p.(Glu1295*)                      | LP          | Y       |
| D870 | 33 | T | N  | NR | Y | <i>PKD1</i>  | 11        | NM_001009944.2:c.2180T>C                | p.(Leu727Pro)                     | LP          | N       |
| D871 | 79 | A | N  | 3  | N | <i>TSC2</i>  | 35        | NM_000548.3:c.4534G>A                   | p.(Asp1512Asn)                    | VUS         | N       |
| D873 | 46 | A | N  | 1  | Y | <i>HNF1B</i> | 2         | NM_000458.3:c.516C>G                    | p.(Tyr172*)                       | P           | Y       |
| D897 | 54 | T | Y  | 1  | Y | <i>PKD2</i>  | 4         | NM_000297.3:c.964C>T                    | p.(Arg322Trp)                     | LP          | N       |
| D913 | 33 | A | N  | 1  | N | <i>GANAB</i> | 10        | NM_198335.3:c.916G>A                    | p.(Val306Met)                     | VUS         | Y       |
| D917 | 28 | A | N  | 1  | N | <i>PKD1</i>  | 15        | NM_001009944.2:c.3483G>T                | p.(Trp1161Cys)                    | VUS         | Y       |
| D925 | 26 | T | Y  | 2  | Y | <i>PKD1</i>  | 16        | NM_001009944.2:c.7008C>G                | p.(Tyr2336*)                      | P           | Y       |
| D927 | 40 | T | N  | 2  | Y | <i>PKD2</i>  | 4         | NM_000297.3:c.916C>T                    | p.(Arg306*)                       | P           | N       |
| D932 | 28 | T | N  | 1  | Y | <i>PKD1</i>  | 15        | NM_001009944.2:c.4070del                | p.(Leu1357fs)                     | P           | N       |
| D933 | 45 | A | Y  | 1  | N | <i>TSC2</i>  | 32        | NM_000548.3:c.3816G>A                   | p.(Val272Val)                     | VUS         | N       |

|      |    |   |    |    |    |              |          |                                       |                                 |           |         |
|------|----|---|----|----|----|--------------|----------|---------------------------------------|---------------------------------|-----------|---------|
| D936 | 25 | T | Y  | 3  | Y  | <i>PKD1</i>  | 15       | NM_001009944.2:c.374<br>5del          | p.(Asp1249fs)                   | P         | Y       |
| D939 | 30 | T | Y  | 1  | Y  | <i>PKD1</i>  | IVS21    | NM_001009944.2:c.801<br>7-2_8017-1del | p.?                             | P         | N       |
| D069 | 31 | T | Y  | 2  | N  | <i>PKD1</i>  | 15       | NM_001009944.2:c.344<br>1C>G          | p.(Tyr1147*)                    | P         | N       |
| D069 |    |   |    |    |    | <i>GANAB</i> | 18       | NM_198335.3:c.2159G><br>A             | p.(Arg720Gln)                   | VUS       | Y       |
| D095 | 35 | A | N  | 3  | N  | <i>PKHD1</i> | 3/<br>41 | NM_138694.3:c.<br>107C>T(:)6800T>C    | p.(Thr36Met)<br>(:)(Leu2267Pro) | P/<br>VUS | N/<br>Y |
| D947 | 6  | A | N  | 1  | N  | <i>PKD1</i>  | 25       | NM_001009944.2:c.904<br>7del          | p.(Gln3016fs)                   | P         | Y       |
| D962 | 39 | A | N  | 1  | Y  | <i>PKHD1</i> | 56       | NM_138694.3:c.8776C><br>T             | p.(Arg2926Trp)                  | VUS       | N       |
| D968 | 49 | A | N  | 1  | N  | <i>PKD1</i>  | 6        | NM_001009944.2:c.136<br>0C>T          | p.(Arg454Cys)                   | VUS       | N       |
| D978 | 36 | T | NR | NR | Y  | <i>PKD1</i>  | 34       | NM_001009944.2:c.104<br>41del         | p.(Val3482fs)                   | P         | Y       |
| D979 | 33 | T | Y  | 1  | N  | <i>PKD1</i>  | 18       | NM_001009944.2:c.748<br>3T>A          | p.(Cys2495Ser)                  | VUS       | Y       |
| D980 | 29 | T | Y  | 1  | N  | <i>PKD1</i>  | 10       | NM_001009944.2:c.209<br>6C>A          | p.(Ser699*)                     | LP        | Y       |
| D981 | 38 | T | N  | 1  | Y  | <i>PKD1</i>  | 10       | NM_001009944.2:c.198<br>7del          | p.(Gln663fs)                    | P         | N       |
| R811 | 35 | T | NR | NR | Y  | <i>PKD2</i>  | 13       | NM_000297.3:c.2407C><br>T             | p.(Arg803*)                     | P         | N       |
| D002 | 35 | T | N  | 3  | Y  | <i>PKD1</i>  | 5        | NM_001009944.2:c.827<br>_830del       | p.(Thr276fs)                    | LP        | Y       |
| D004 | 51 | T | Y  | 5  | NR | <i>PKD1</i>  | 15       | NM_001009944.2:c.363<br>1G>T          | p.(Glu1211*)                    | LP        | Y       |
| D024 | 1  | A | N  | 1  | N  | <i>HNF1B</i> |          | Whole gene deletion                   |                                 | P         | N       |

|      |    |   |    |    |   |                |       |                                                                     |                              |        |     |
|------|----|---|----|----|---|----------------|-------|---------------------------------------------------------------------|------------------------------|--------|-----|
| D851 | 69 | A | NR | 2  | N | <i>PKHD1</i>   | 61    | NM_138694.3:c.10174C>T                                              | p.(Gln3392*)                 | P      | N   |
| D809 | 57 | T | Y  | NR | Y | <i>PKD1</i>    | 15    | NM_001009944.2:c.6025T>C                                            | p.(Ser2009Pro)               | VUS    | Y   |
| D828 | 33 | T | Y  | NR | Y | <i>PKD1</i>    | 23    | NM_001009944.2:c.8311G>A                                            | p.(Glu2771Lys)               | LP     | N   |
| D808 | 25 | T | NR | NR | Y | <i>PKD1</i>    | 46    | NM_001009944.2:c.12506del                                           | p.(Lys4170ArgfsTer28)        | LP     | Y   |
| D807 | 55 | A | NR | NR | Y | <i>DNAJB11</i> | 4     | NM_016306.5:c.400del                                                | p.(Ile134fs)                 | LP     | Y   |
| D763 | 35 | T | Y  | 1  | N | <i>PKD1</i>    | 16    | NM_001009944.2:c.6970dup                                            | p.(Thr2324fs)                | LP     | Y   |
| D579 | 35 | T | NR | NR | Y | <i>PKD2</i>    | IVS9  | NM_000297.3:c.2019+1G>A                                             | p.?                          | P      | Y   |
| D683 | 34 | T | N  | 1  | Y | <i>PKD1</i>    | 27    | NM_001009944.2:c.9568G>A                                            | p.(Gly3190Arg)               | LP     | Y   |
| D644 | 75 | T | N  | NR | N | <i>PKHD1</i>   | 32/32 | NM_138694.3:c.3761_3785delinsGCCCCAGATACCCGATGCGGGCGT(;)<br>5134G>A | p.(Gln1254fs)(;)(Gly1712Arg) | LP/VUS | Y/N |
| D608 | 32 | T | NR | NR | Y | <i>PKD2</i>    | 5     | NM_000297.4:c.1235dup                                               | p.(Asn412fs)                 | LP     | N   |
| D607 | 40 | T | NR | NR | N | <i>PKD1</i>    | 20    | NM_001009944.2:c.7743_7767dup                                       | p.(Gly2590fs)                | LP     |     |
| D684 | 39 | T | NR | NR | Y | <i>PKD1</i>    | 28    | NM_001009944.2:c.9592C>T                                            | p.(Gln3198*)                 | P      | N   |
| D67  | 11 | A | N  | 1  | N | <i>PRKCSH</i>  | 16    | NM_001001329.2:c.1260C>G                                            | p.(Tyr420*)                  | VUS    |     |
| D573 | 27 | T | N  | NR | Y | <i>PKD1</i>    | 11    | NM_001009944.2:c.2289_2299del                                       | p.(Cys767fs)                 | LP     | Y   |

|      |    |   |    |    |   |                |      |                                    |                |     |   |
|------|----|---|----|----|---|----------------|------|------------------------------------|----------------|-----|---|
| D544 | 76 | A | NR | 3  | N | <i>PRKCSH</i>  | 16   | NM_002743.3:c.1390A>G              | p.(Lys464Glu)  | VUS | Y |
| D462 | 39 | T | NR | NR | Y | <i>PKD1</i>    | 19   | NM_001009944.2:c.7642G>T           | p.(Glu2548*)   | P   | Y |
| D296 | 59 | A | N  | 3  | N | <i>DNAJB11</i> | 6    | NM_016306.5:c.616C>T               | p.(Arg206*)    | P   | N |
| D297 | 24 | T | N  | 2  | Y | <i>PKD2</i>    | 2    | NM_000297.3:c.637C>T               | p.(Arg213*)    | P   | N |
| D263 | 31 | A | N  | NR | Y | <i>PKD1</i>    | 35   | NM_001009944.2:c.10524del          | p.(Glu3509fs)  | LP  | Y |
| D254 | 36 | T | N  | 1  | y | <i>PKD1</i>    | 15   | NM_001009944.2:c.4070del           | p.(Leu1357fs)  | P   | N |
| D428 | 30 | T | NR | NR | Y | <i>PKD1</i>    | 14   | NM_001009944.2:c.3294_3295delinsTT | p.?            | VUS | Y |
| D436 | 31 | T | N  | 1  | Y | <i>PKD1</i>    | 23   | NM_001009944.2:c.8543T>C           | p.(Val2848Ala) | VUS | Y |
| D009 | 33 | A | N  | 1  | N | <i>PKD1</i>    | 15   | NM_001009944.2:c.6229G>C           | p.(Ala2077Pro) | VUS | Y |
| D377 |    |   |    |    |   | <i>PKD2</i>    | 15   | NM_000297.3:c.2807del              | p.(Asn936fs)   | VUS | Y |
| D377 | 58 | T | Y  | 3  | N | <i>PKD1</i>    | 34   | NM_001009944.2:c.10407T>A          | p.(Asp3469Glu) | VUS | Y |
| D421 | 59 | T | N  | 4  | N | <i>PKD1</i>    | 15   | NM_001009944.2:c.3437_3439del      | p.(Phe1146del) | VUS | Y |
| D048 | 47 | A | NR | 1  | N | <i>HNF1B</i>   |      | Whole gene deletion                |                | P   | N |
| D916 | 20 | A | N  | 2  | N | <i>PKD1</i>    | 3    | NM_001009944.2:c.348_352del        | p.(Asn116fs)   | P   | N |
| D520 | 63 | T | N  | 3  | Y | <i>PKD2</i>    | IVS1 | NM_000297.4:c.709+6T>G             | p.?            | VUS | Y |

|      |    |   |    |    |    |                |       |                                   |                |      |   |
|------|----|---|----|----|----|----------------|-------|-----------------------------------|----------------|------|---|
| D605 | 32 | T | N  | 1  | Y  | <i>PKD1</i>    | 17    | NM_001009944.2:c.710<br>8T>C      | p.(Cys2370Arg) | LP   | N |
| D961 | 24 | T | NR | NR | NR | <i>PKD1</i>    | 5     | NM_001009944.2:c.856<br>_862del   | p.(Gly287fs)   | P    | N |
| D914 | 34 | A | N  | NR | Y  | <i>PKD2</i>    | 4     | NM_000297.3:c.1039del             | p.(Val347fs)   | P    | Y |
| D106 | 52 | A | NR | NR | Y  | <i>PKD1</i>    | 6     | NM_001009944.2:c.136<br>0C>T      | p.(Arg454Cys)  | VUS  | Y |
| D781 | 27 | T | NR | 1  | Y  | <i>PKD1</i>    | 16    | NM_001009944.2:c.699<br>4_7000del | p.(Ala2332fs)  | Path | N |
| D573 | 41 | T | NR | 1  | Y  | <i>PKD1</i>    | 15    | NM_001009944.2:c.450<br>7G>A      | p.(Gly1503Arg) | VUS  | N |
| D207 | 30 | A | NR | NR | N  | <i>TSC2</i>    | 3     | NM_000548.4:c.175C>T              | p.(Arg59Trp)   | VUS  | Y |
| D404 | 20 | A | N  | 1  | N  | <i>PKD2</i>    | IVS6  | NM_000297.3:c.1549-<br>1G>A       | p.?            | P    | Y |
| D732 | 42 | A | NR | 1  | Y  | <i>DNAJB11</i> | 4     | NM_016306.5:c.430G>T              | p.(Glu144*)    | LP   | Y |
| D461 | 48 | A | NR | 1  | Y  | <i>PKD2</i>    | 4     | NM_000297.4:c.875A>G              | p.(Tyr292Cys)  | LP   | N |
| D057 | 34 | A | N  | 2  | N  | <i>HNF1B</i>   |       | Whole gene deletion               |                | P    | N |
| D717 | 38 | T | N  | 1  | Y  | <i>PKD2</i>    | 11-13 | NM_000297.3:c.2119_2<br>522del    | p.?            | P    | Y |
| D561 | 60 | A | NR | NR | N  | <i>PKD1</i>    | 45    | NM_001009944.2:c.123<br>07del     | p.(Ala4103fs)  | P    | Y |

T = Typical disease; A = Atypical disease; Enlarged Kidney = Bilateral Kidney length  $\geq 14.5$ cm, or reported 'enlarged' by clinician, Y = Yes; N = No; NR = Not Reported; FHx = family History; PKD = polycystic kidney disease <sup>\$</sup>*PKD1* NM\_001009944.2, *PKD2* NM\_000297.3, *PKHD1* NM\_138694.3, *GANAB* NM\_198335.3, *HNF1B* NM\_000458.3, *TSC2* NM\_000548.3, *DNAJB11* NM\_016306.5; ^Exons are numbered like in *PKD1* NG\_008617, *PKD2* NG\_008604.1, *PKHD1* NG\_008753.1, *GANAB* NG\_053018.1, *HNF1B* NG\_013019.2, *TSC2* NG\_005895.1, *DNAJB11* NG\_034024.1; & *PKD1* NP\_001009944.2, *PKD2* NP\_000288.1, *PKHD1* NP\_619639.3, *GANAB* NP\_938149.2, *HNF1B* NP\_000449.1, *TSC2* NP\_000539.2, *DNAJB11* NP\_057390.1; #as per ACMG criteria; P = Pathogenic; LP = Likely Pathogenic; VUS = Variant of Uncertain Significance
